# Supplementary material
Source: PubMed Central journal article supplement (PMC4676535)
Supplement: supp_115.180737_FigureS3.pdf [file supp_115.180737_FigureS3.pdf]

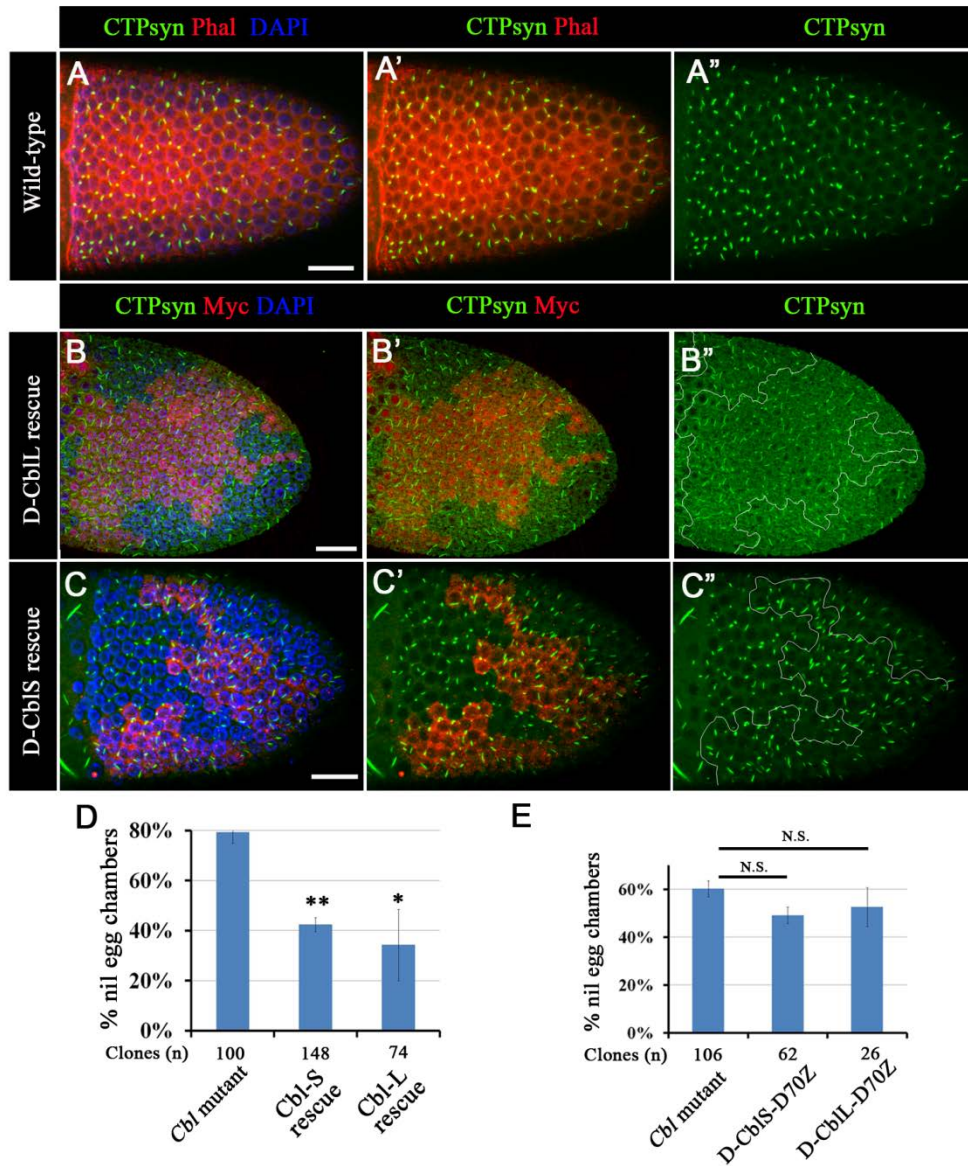

**Figure S3. Both isoforms of Cbl partially rescued the defective phenotype of *Cbl***

**mutant cells.** (A–A'') Multiple surface confocal sections of the stage 9 wild-type egg

chamber. CTPsyn filaments were revealed by anti-CTPsyn antibody (green). DNA

was stained with DAPI (blue). Phalloidin is shown in red. (B–C'') Mosaic egg

chambers containing *Cbl*<sup>F165</sup> mutant follicle cell clones were labeled as described in Figure S2A. CTPsyn filaments were restored by constitutive expression of CblL-PR<sup>Drk</sup> (B-B'') and CblS (C-C'') in *Cbl* mutant cells (Myc-negative). (D) The nil phenotype was calculated in *Cbl* mutant cells with or without CblL-PR<sup>Drk</sup> or CblS expression in stage 10 egg chambers. (E) The nil phenotype was calculated in *Cbl* mutant cells with or without D-CblS-D70Z and D-CblL-D70Z rescued in stage 10. Results are shown as the mean  $\pm$  s.e.m; \**p* < 0.05 and \*\**p* < 0.01. N.S indicates not significant. Scale bar: 20  $\mu$ m.
