# Supplementary material
Source: PubMed Central journal article supplement (PMC4676535)
Supplement: supp_115.180737_FigureS4.pdf [file supp_115.180737_FigureS4.pdf]

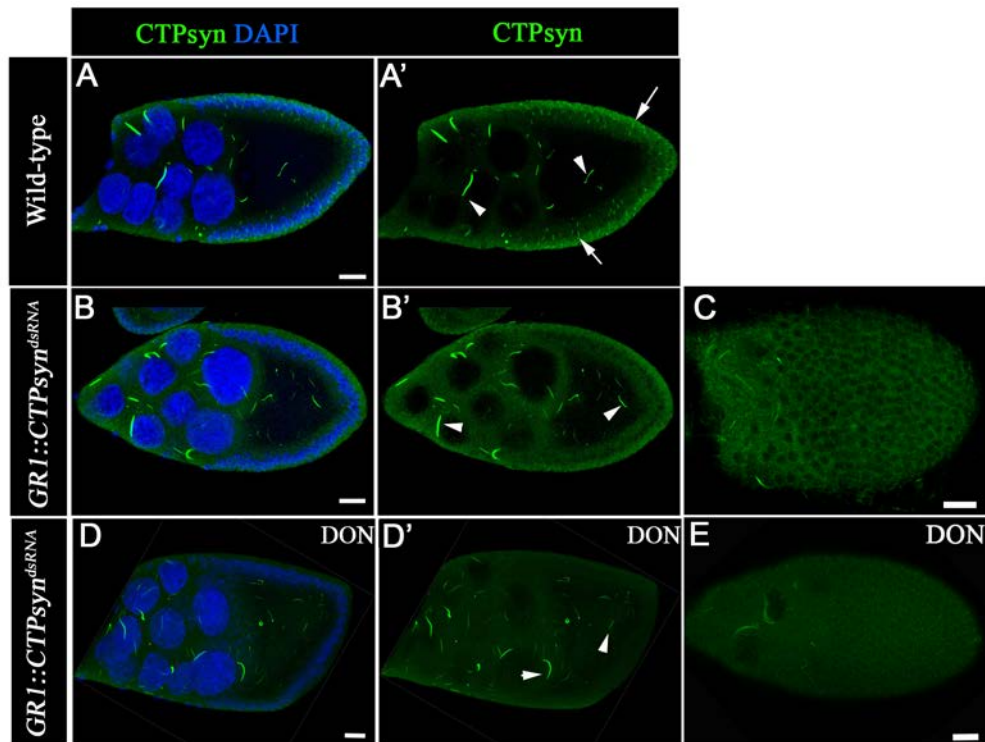

**Figure S4. CTPsyn filament formation depends on CTPsyn protein levels in follicle cells.** (A–E) Multiple confocal cross sections (A–A', B–B', D–D') and surface-sections (C, E) of stage 9 egg chambers were immunostained with anti-CTPsyn antibody (green) and DAPI (blue). (A–A') In the wild-type egg chamber, macro-cytoophidia were presented in the germline cells (arrowhead) and cytoophidia were presented in the main-body follicle cells (arrow). (B–C) Dcr2 and CTPsyn RNAi were co-overexpressed in the main-body follicle cells to reduce the level of CTPsyn. Macro-cytoophidia were not affected in the germline (arrowhead). (D–E) CTPsyn-depleted egg chambers were treated with 500  $\mu\text{g/ml}$  DON. Scale bar: 20  $\mu\text{m}$ .
