# Supplementary material
Source: PubMed Central journal article supplement (PMC4676535)
Supplement: supp_115.180737_FigureS5.pdf [file supp_115.180737_FigureS5.pdf]

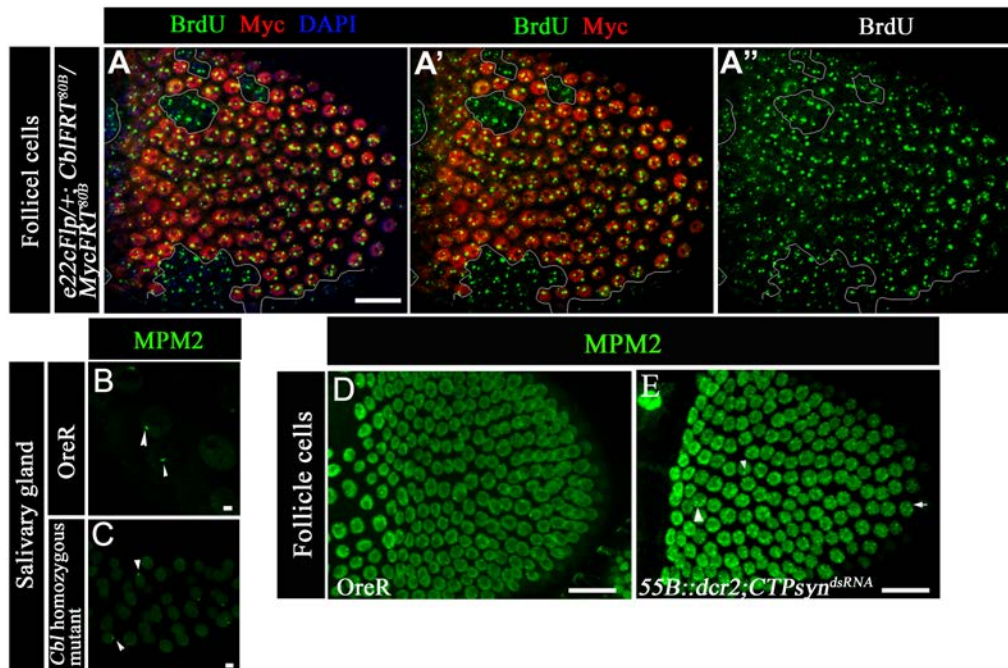

**Figure S5. The effect of *Cbl* on the occurrence of S phase.** (A-A'') Mosaic egg chambers containing *Cbl* mutant follicle cell clones. Cells were labeled as described in Figure S2A. BrdU incorporation (green) is shown in the follicular epithelium containing mosaic clones for *Cbl* (Myc-negative cells, white lines) of stage 10B egg chambers. (B–C) MPM2 signals in wild-type (B) and *Cbl* homozygous (C) salivary glands. (D–E) The MPM2 signal (arrow) was detected in stage 9 egg chambers of wild-type posterior follicle cells (E, arrow) and in CTPsyn-depleted (E) anterior follicle cells expressing Dcr2 and CTPsyn<sup>RNAi</sup>. The MPM2 signals did not differ significantly between anterior (arrowhead) and posterior follicle cells (arrow). Scale bar: 20  $\mu$ m (A–A'', D, E), 5  $\mu$ m (B, C).
