# Supplementary material
Source: PubMed Central journal article supplement (PMC4676535)
Supplement: supp_115.180737_FigureS6.pdf [file supp_115.180737_FigureS6.pdf]

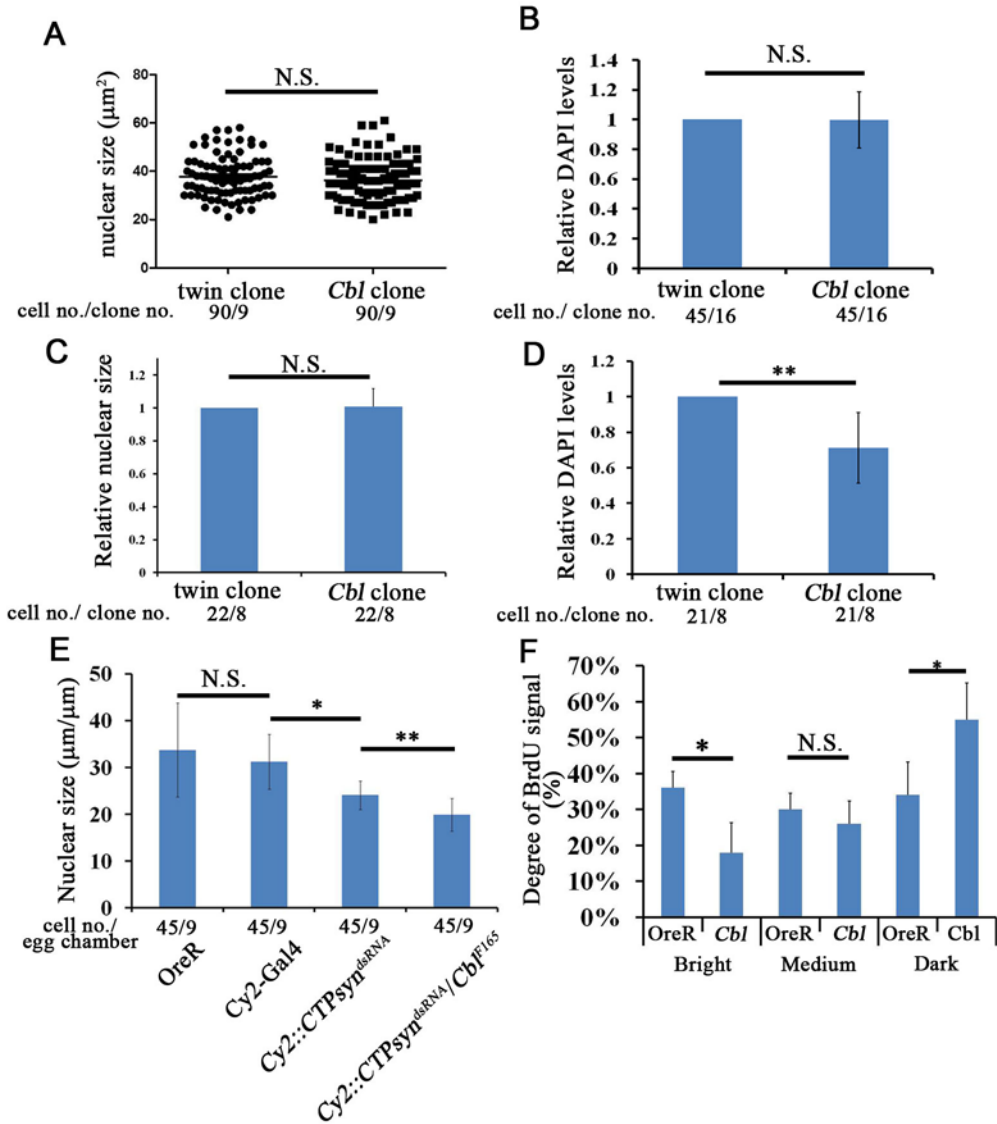

**Figure S6. The effect of *Cbl* on nuclear size and intensity.** (A and C) The nuclear size of twin clones and *Cbl* clones in egg chambers (A) or salivary glands (C) were measured. (B and D) The relative intensities of nuclear DAPI signal in twin wild-type and *Cbl* follicular clones of egg chambers (B) or salivary glands (D) were measured. (E) The nuclear sizes of follicle cells of egg chambers shown in Figure 5 were measured. (F) Percentages of BrdU classes in wild-type or *Cbl* homozygous salivary glands from three independent experiments. BrdU signals were classified as bright (B),

medium (M), or dark (D). Results are shown as the mean  $\pm$  s.d.; \* $p < 0.05$ ; \*\*  $p < 0.01$ ; N.S.: not significant.
